# Supplementary material for: Single-Cell Sequencing Analysis and Weighted Co-Expression Network Analysis Based on Public Databases Identified That TNC Is a Novel Biomarker for Keloid
Source: Front Immunol. 2021 Dec 22;12:783907. doi: 10.3389/fimmu.2021.783907 (PMC8728089; doi:10.3389/fimmu.2021.783907)
Supplement: Supplementary file 2 [file DataSheet_2.csv]

ClusterID	celltype
0	Tissue_stem_cells
1	Tissue_stem_cells
2	Fibroblasts
3	Chondrocytes
4	Fibroblasts
5	Fibroblasts
6	Tissue_stem_cells
7	Chondrocytes
8	Chondrocytes
9	Chondrocytes
10	Tissue_stem_cells
11	Tissue_stem_cells
