# Supplementary material for: Single-Cell Sequencing Analysis and Weighted Co-Expression Network Analysis Based on Public Databases Identified That TNC Is a Novel Biomarker for Keloid
Source: Front Immunol. 2021 Dec 22;12:783907. doi: 10.3389/fimmu.2021.783907 (PMC8728089; doi:10.3389/fimmu.2021.783907)
Supplement: Supplementary file 3 [file DataSheet_3.csv]

Gene	p_val	avg_log2FC	pct.1	pct.2	p_val_adj
POSTN	2.06E-155	4.078488322	0.87	0.223	4.86E-151
ASPN	1.43E-117	3.181161889	0.807	0.292	3.37E-113
COMP	3.29E-94	2.229999419	0.703	0.175	7.78E-90
FN1	1.86E-82	2.198161343	0.929	0.707	4.39E-78
COL3A1	1.81E-105	1.987068399	0.998	0.946	4.28E-101
IGFBP2	4.58E-06	1.470419242	0.268	0.11	0.108230495
APOD	0.082842463	1.038332853	0.878	0.821	1
CCL19	0.001084825	0.976252485	0.354	0.212	1
IGFBP7	7.29E-08	0.938529391	0.988	0.944	0.001722141
OLFML2A	0.000118162	0.852605505	0.28	0.14	1
CCL2	1.18E-95	2.450896662	0.82	0.357	2.78E-91
CCL191	4.71E-44	2.317517532	0.43	0.127	1.11E-39
CXCL2	5.18E-49	1.746795512	0.824	0.568	1.22E-44
CXCL3	6.37E-45	1.669793173	0.728	0.432	1.50E-40
RGS16	4.53E-56	1.656357115	0.826	0.56	1.07E-51
CXCL14	1.65E-25	1.162370403	1	0.933	3.90E-21
CFD	1.46E-30	1.11116994	1	0.91	3.45E-26
GSN	3.12E-23	0.92576793	0.993	0.975	7.38E-19
SOD3	2.87E-26	0.90090676	0.987	0.808	6.78E-22
CFH	6.18E-21	0.838634933	1	0.902	1.46E-16
PLA2G2A	7.42E-52	2.9173344	0.499	0.149	1.75E-47
SLPI	1.94E-80	2.390953113	0.551	0.102	4.60E-76
WISP2	7.92E-109	2.390114778	0.938	0.545	1.87E-104
PI16	5.64E-85	2.024406513	0.821	0.314	1.33E-80
FBLN1	7.92E-131	1.703313665	1	0.921	1.87E-126
